# Supplementary material for: 1D versus 2D cocrystals growth via microspacing in-air sublimation
Source: PubMed Central journal article supplement (PMC6377649; doi:10.1038/s41467-019-08712-1), 2019-02-15
Supplement: 41467_2019_8712_MOESM1_ESM.pdf [file 41467_2019_8712_MOESM1_ESM.pdf]

## **Supplementary Information**

### 1D Versus 2D Cocrystals Growth via Microspacing In-Air Sublimation

Ye et al.

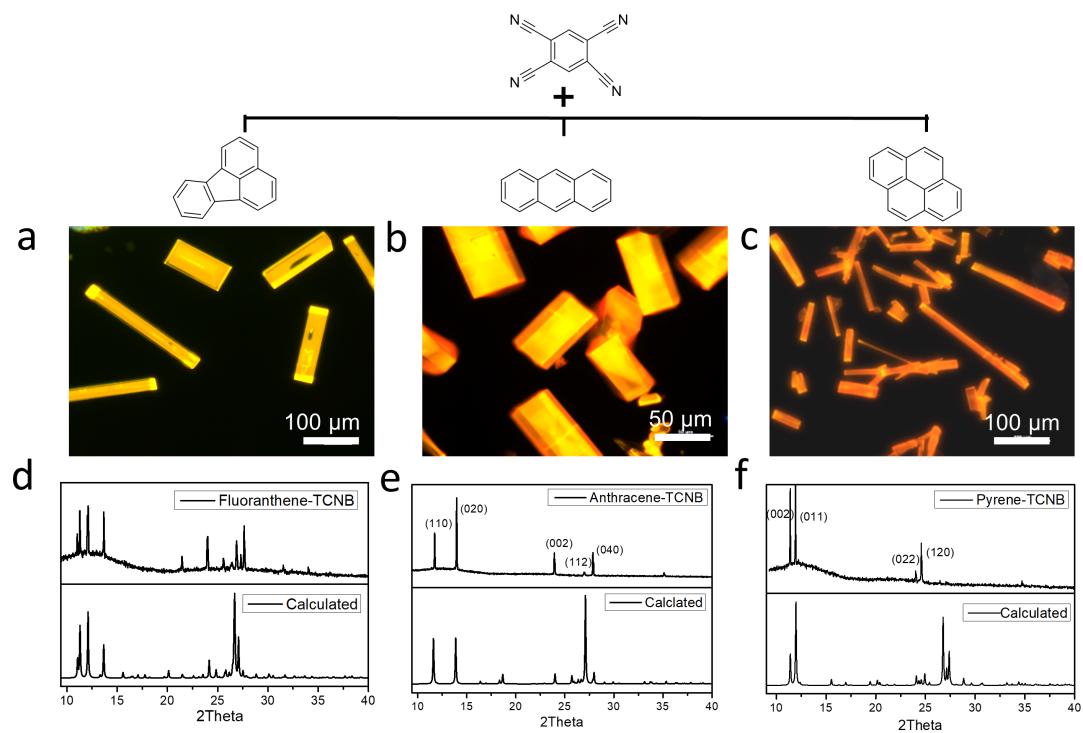

**Supplementary Figure 1** (a-c) Fluorescence microscope images of fluoranthene-TCNB, anthracene-TCNB, and pyrene-TCNB cocrystals grown by MAS. (d-e) The corresponding XRD patterns of cocrystals.

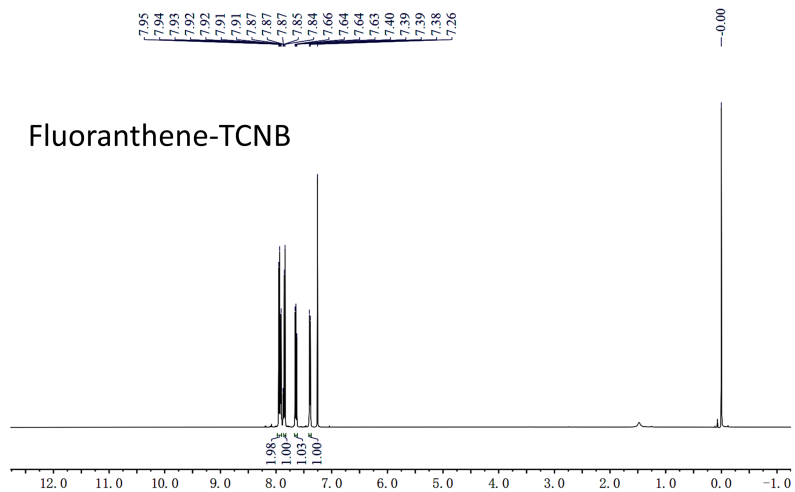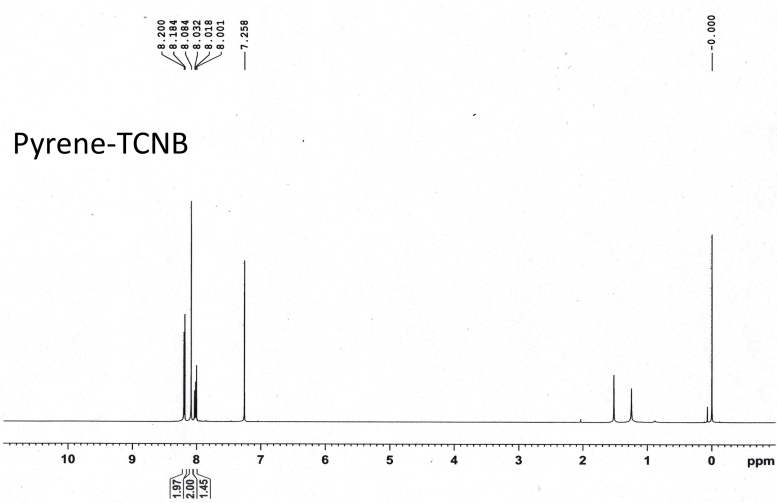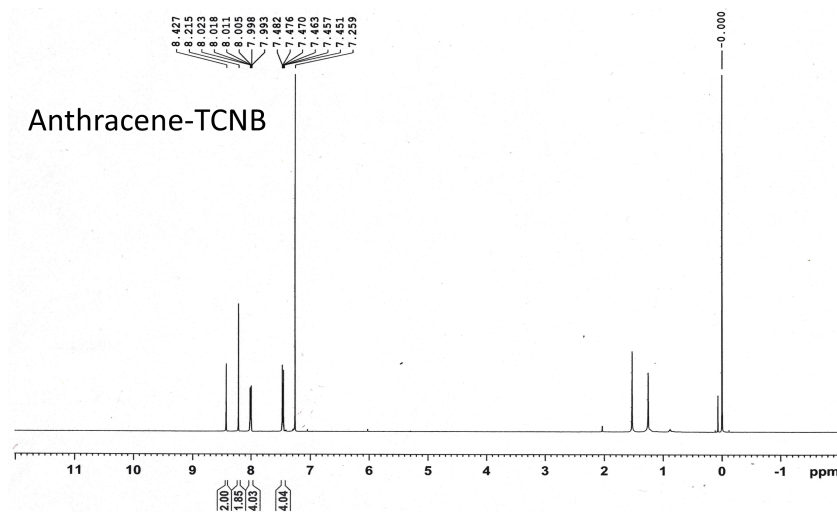

**Supplementary Figure 2**  $^1\text{H}$  NMR spectra of fluoranthene-TCNB, pyrene-TCNB and anthracene-TCNB cocrystals grown by MAS.

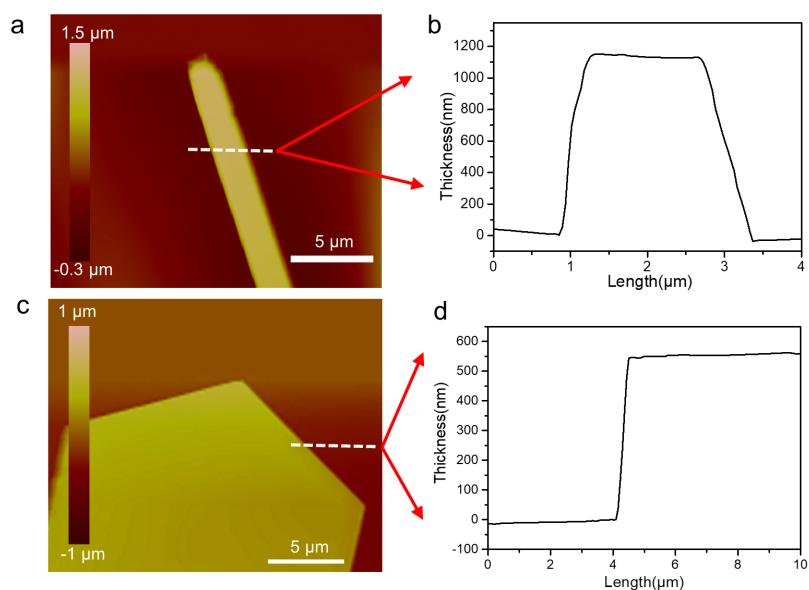

**Supplementary Figure 3** AFM image of thin MAS-grown 1D needle-like (a) and 2D plated (c) FTCs cocrystal. (b and d) The corresponding thickness profile measured along dashed white line.

**Supplementary Table 1.** Crystallographic data and structure refinement parameters of FTCs.

|                                             |                   |
|---------------------------------------------|-------------------|
| Compound reference                          | Fluoranthene-TCNB |
| Formula Mass                                | 380.40            |
| Crystal system                              | Orthorhombic      |
| Space group                                 | P21/c             |
| $a/\text{\AA}$                              | 7.362(5)          |
| $b/\text{\AA}$                              | 8.263(6)          |
| $c/\text{\AA}$                              | 31.29(2)          |
| $\alpha, \gamma$ (deg)                      | 90                |
| $B$ (deg)                                   | 90.250(14)        |
| Unit cell volume/ $\text{\AA}^3$            | 1903(2)           |
| Temperature/K                               | 293               |
| No. of formula units per unit cell, $Z$     | 4                 |
| Collected reflns                            | 17970             |
| Unique reflns                               | 3348              |
| $R_{\text{int}}$                            | 0.0311            |
| Final $R_1$ values ( $I > 2\sigma(I)$ )     | 0.0364            |
| Final $wR(F^2)$ values ( $I > 2\sigma(I)$ ) | 0.0932            |
| Final $wR(F^2)$ values (all data)           | 0.1004            |
| Goodness of fit on $F^2$                    | 1.043             |

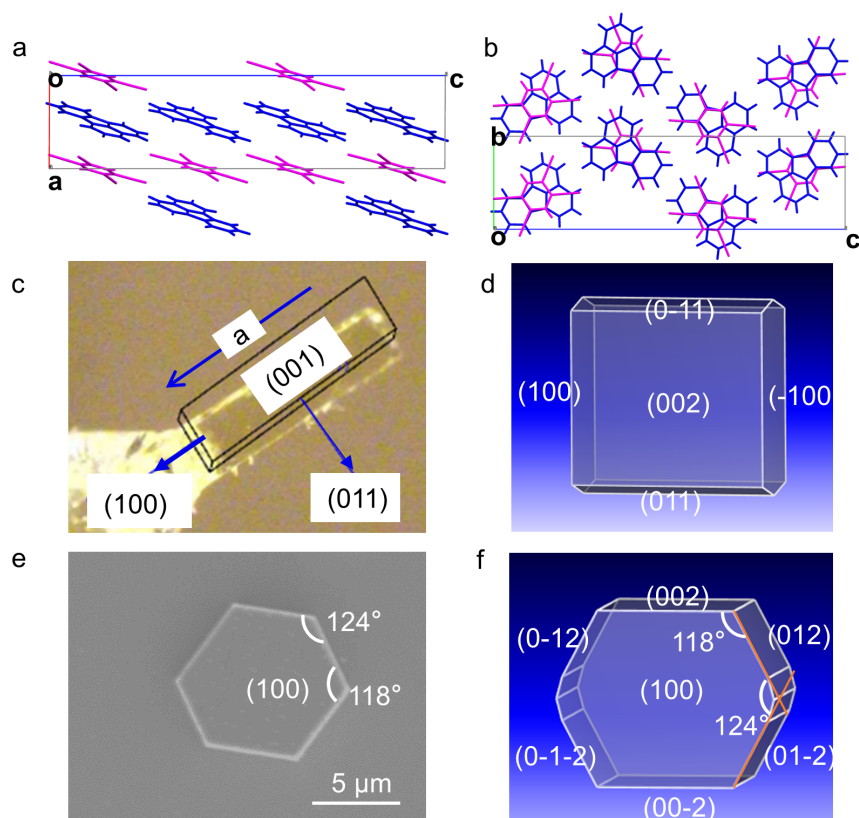

**Supplementary Figure 4** Molecular packing of FTCs in the basal (a-c) plane (a) and (b-c) plane (b). (c) Face-indexing graphics of 1D needle-like FTCs. (d) Predicted crystal morphology based on the attachment energies by using the material studio package. (e) SEM image of 2D plate-like FTCs. (f) The equilibrium shape for minimum total surface energy, calculated by the software of Materials Studio package.

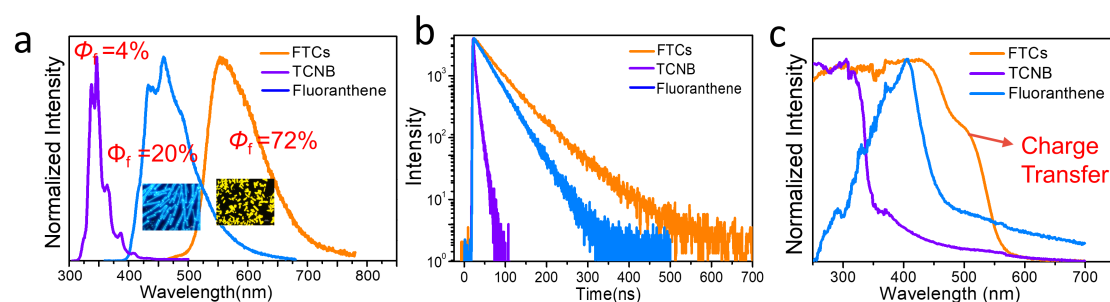

**Supplementary Figure 5** Luminescent properties of grown cocrystals. The PL spectra (a) and absorption spectra (b) of as-grown fluoranthene, TCNB and FTCs, (inset: fluorescence microscopy images of fluoranthene and cocrystals grown by MAS) (c) Time-resolved fluorescence decay profile of fluoranthene, TCNB, and FTCs.

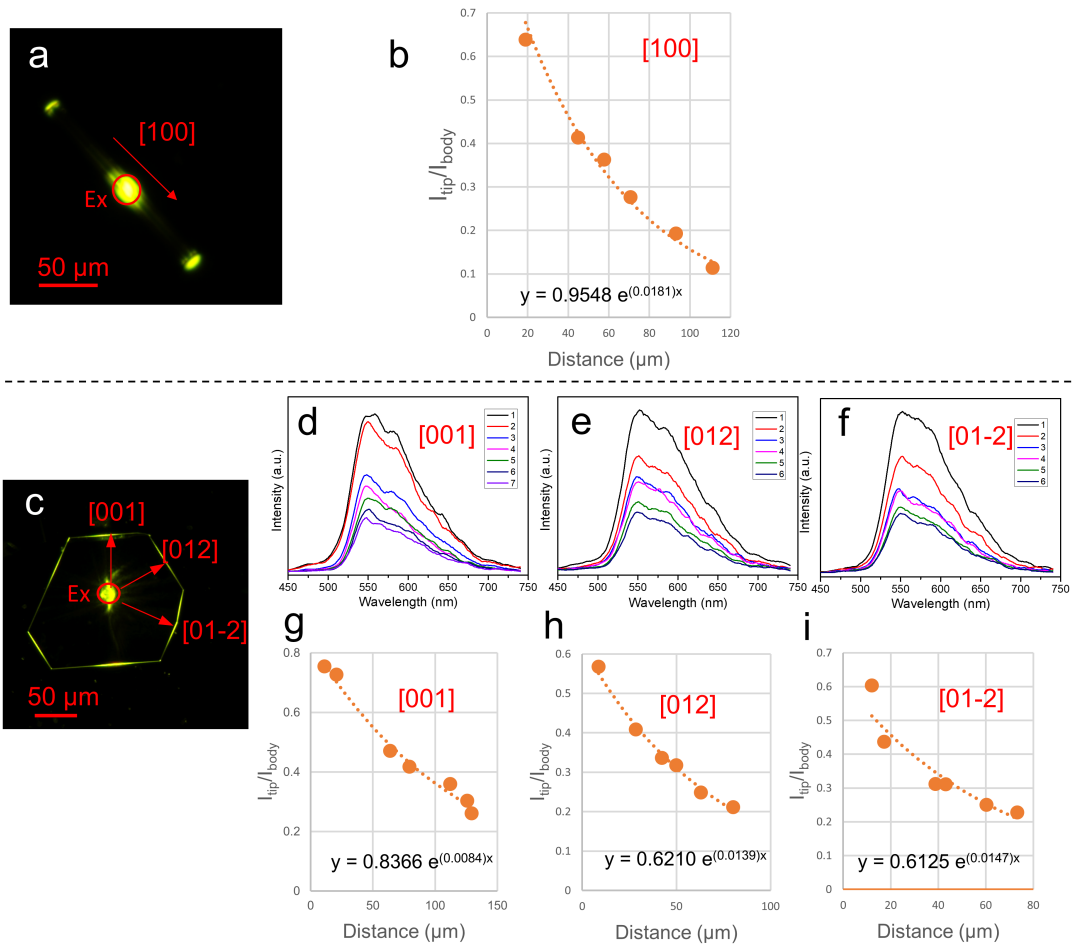

**Supplementary Figure 6** (a and c) Fluorescence microscopy images 1D and 2D FTCs. (b, g-i) Ratio of PL intensity,  $I_{tip}/I_{body}$ , against the propagation distance of different directions. The curves were fitted by an exponential decay function. (d-e)  $\mu$ -PL spectra collected from the tip of FTCs when the excitation spot was moved.

The PL intensity at the excited site along the body of 1D or 2D FTC ( $I_{body}$ ) and at the emitting edge ( $I_{tip}$ ) were recorded, and the ratio  $I_{tip}/I_{body}$  shows a single-exponential decay against propagation distance, which indicates the active nature of the optical waveguide. The optical-loss coefficient ( $R$ ) was calculated by single-exponential fitting  $I_{tip}/I_{body} = A e^{-RD}$ , where  $D$  is the distance between the excited site and the emitting edge.

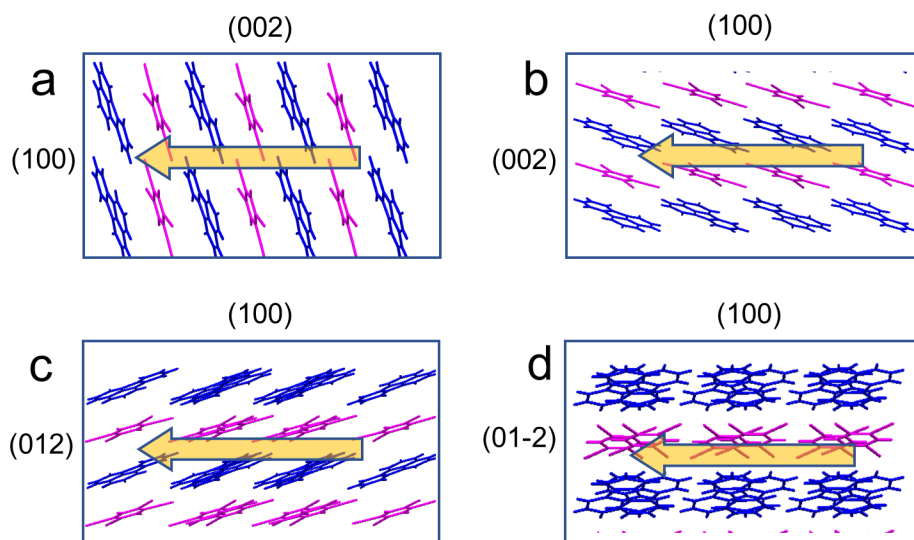

**Supplementary Figure 7** (a) Molecular packing of the 1D FTCs along the [100] direction. (b-d) Molecular packing of 2D FTCs along the [002], [012] and [01-2] direction.

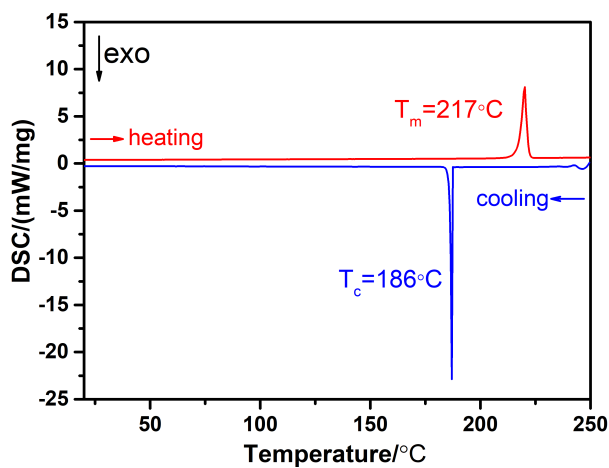

**Supplementary Figure 8** DSC analyses of FTCs at a rate of  $10^{\circ}\text{C min}^{-1}$ . The red curve is the heating curve and the blue one is the cooling curve. The  $T_c$  and  $T_m$  denote the recrystallization and melting temperatures respectively.

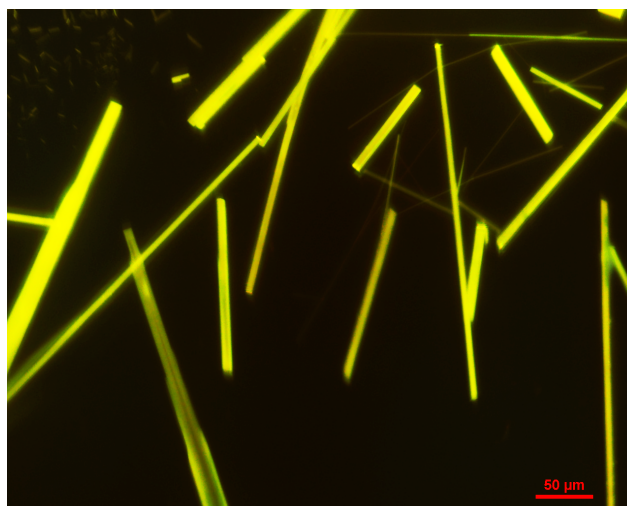

**Supplementary Figure 9** Fluorescence microscope image of FTCs grown from solution.

**Supplementary Table 2.** Surface energies of various crystal facets (hkl) calculated by the material studio package.

| <b>hkl</b>                         | <b>(002)</b> | <b>(011)</b> | <b>(100)</b> | <b>(012)</b> |
|------------------------------------|--------------|--------------|--------------|--------------|
| $\gamma$ (kcal·mol <sup>-1</sup> ) | 8.02         | 29.38        | 43.49        | 30.00        |



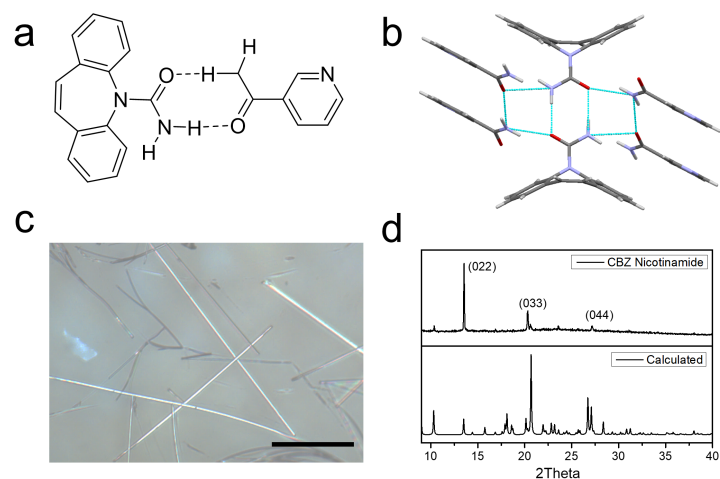

**Supplementary Figure 10** Chemical structures (a), single crystal structures (CCDC NO.: 212375) (b), microscope image (c) and XRD patterns (d) of carbamazepine-nicotinamide cocrystals grown by MAS.

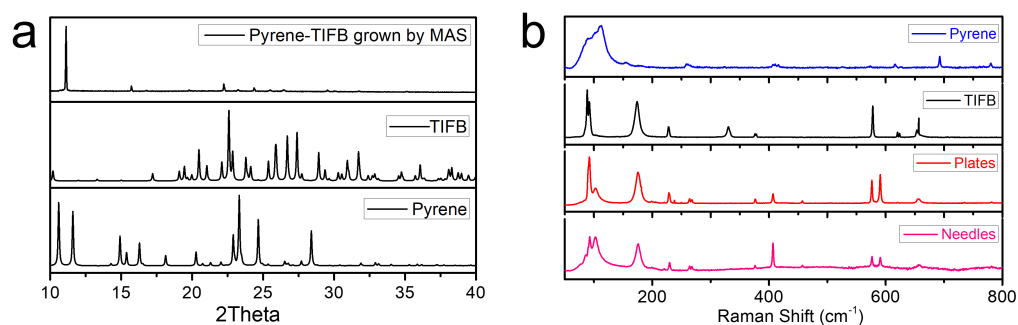

**Supplementary Figure 11** XRD pattern (a) and Raman spectra (b) of 1D needle-like and 2D plate-like pyrene-TIFB cocrystals, TIFB and pyrene.

The XRD patterns and Raman spectra of the as-grown pyrene-TIFB cocrystals are distinct from that of each constituent molecule, suggesting the formation of cocrystals. The difference of relative peak intensity in Raman spectra of the needle-like and plate-like cocrystals may be related with different morphology.

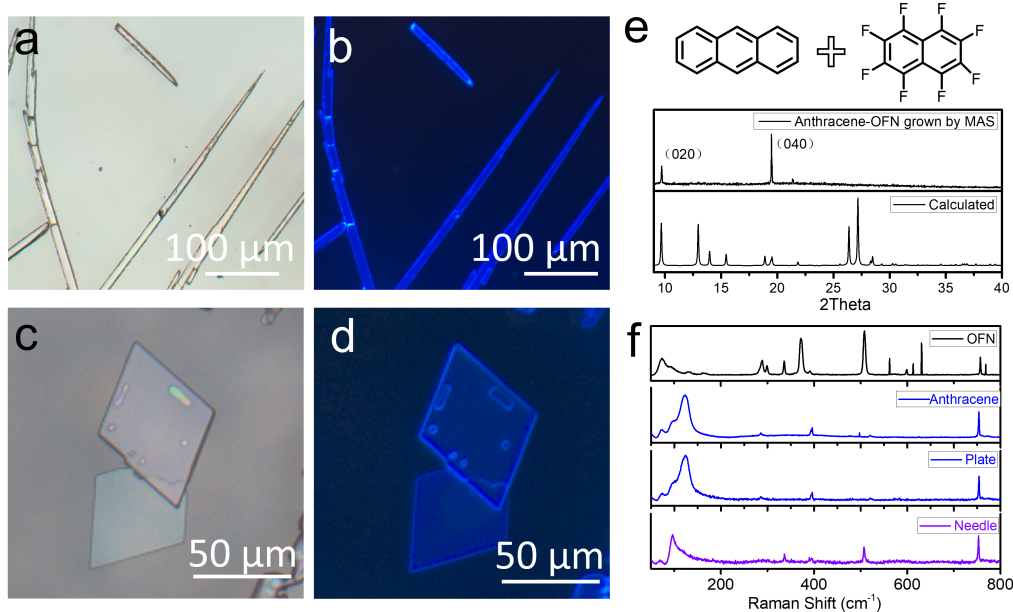

**Supplementary Figure 12** Microscope images (a, c) and fluorescence microscope images (b, d), XRD pattern (e) and Raman spectra (f) of 1D needle-like anthracene-OFN cococrystals (a-b) and 2D plate-like (c-d) anthracene crystals. (Scale bar: 100  $\mu\text{m}$  for a and b, 50  $\mu\text{m}$  for others).

For the anthracene–octafluoronaphthalene complex, when growing at relative lower temperature (100  $^{\circ}\text{C}$ ), 1D needles crystalized on the substrate (Supplementary Figure 12a); when growing at relative higher temperature (higher than 120  $^{\circ}\text{C}$ ), 2D plates formed (Supplementary Figure 12c). However, it is not the case that morphology control is realized on anthracene–OFN. According to the XRD pattern and Raman spectra in **Supplementary Figure 12e–f**, the 1D needles are indeed cococrystals, with oriented growth of b-axis perpendicular to the substrate surface. But the Raman spectra of 2D plates shows that they actually are anthracene crystals.

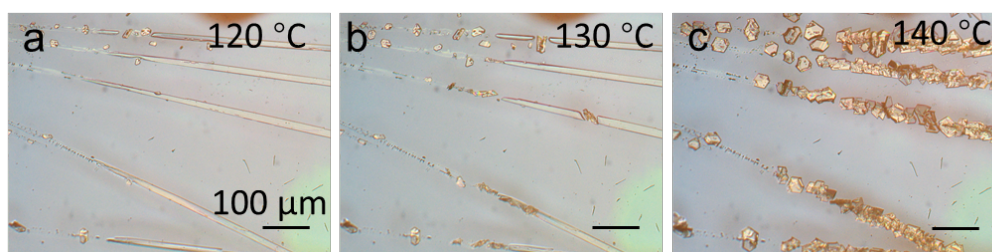

**Supplementary Figure 13** Microscope images of in situ observation of transformation from needle-like cococrystals to plate-like anthracene crystals during the heating process. (Scale bar: 100  $\mu\text{m}$ ). During the heating process the needle-like cococrystals decomposed and then plated anthracene crystals appeared.

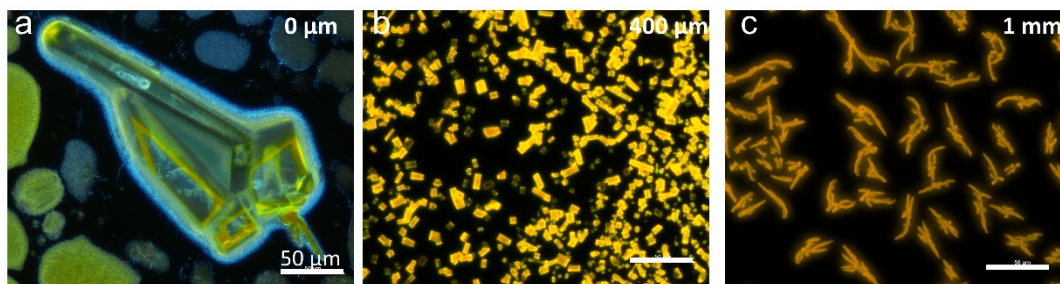

**Supplementary Figure 14** Fluorescence microscope images of cocrystals grown by MAS with different space  $h$ . (a) The top substrate is prone to directly contact with the melt, so we label it as  $0 \mu\text{m}$ , cocrystal is hard to crystalize from the melt, resulting many glassy state solidified residuals. (b) When the space  $h$  is of about  $400 \mu\text{m}$ , the crystallinity is okay, but maybe because of too many of nucleuses the length of the grown cocrystals is much shorter than that in a case of  $150 \mu\text{m}$ . (c) For the case of an even larger  $h$  of  $1 \text{ mm}$ , the grown cocrystals are no more isolated single crystals but dendritic polycrystals.
